# Supplementary material
Source: PubMed Central journal article supplement (PMC2965938)
Supplement: mmc1.pdf [file mmc1.pdf]

Biophysical Journal, Volume 99

**Supporting Material**

**Movements of individual BK<sub>Ca</sub> channels in live cell membrane monitored by site-specific labeling using quantum dots**

Sehoon Won, Hae-Deun Kim, Ji-Yeon Kim, Byoung-Cheol Lee, Sunghoe Chang and Chul-Seung Park

## **Supporting Material**

### **Cell culture**

COS-7 cells were maintained in DMEM (Thermo, Waltham, MA) supplemented with 10% fetal bovine serum (Thermo, Waltham, MA) and neurobasal medium (Gibco-RRL, Carlsbad, CA) containing B-27 supplement (Gibco-RRL) and 200 mM Glutamax (Gibco-RRL), and incubated in 5% CO<sub>2</sub> at 37°C. Primary hippocampal neurons were cultured from the hippocampi of embryonic Sprague Dawley rats at day 18 (Orientbio Inc., Korea), following the modified protocol of Goslin and Banker. Hippocampi were dissociated by enzyme digestion with papain at 37°C for 30 min and triturated by two different sized Pasteur pipettes. For live imaging, neurons were plated onto 18-mm coverslips coated with 0.05 mg/ml poly-D-lysine (Sigma-Aldrich, St. Louis, MO) at a density of 4×10<sup>4</sup> cells per coverslip. Neurons were incubated in neurobasal medium (Gibco-RRL) containing B-27 supplement (Gibco-RRL), 200 mM Glutamax (Gibco-RRL) and 25 mM L-glutamate (Sigma-Aldrich). One hour after plating, the culture medium was changed to neurobasal medium (Gibco-RRL) containing B-27 supplement (Gibco-RRL) and 200 mM Glutamax (Gibco-RRL). Cells were incubated in 5% CO<sub>2</sub> at 37°C. At 7 days *in vitro* (DIV7), half of the medium was exchanged with new medium to support nutrition.

### **Confocal imaging and co-immunoprecipitation**

For confocal imaging, COS-7 cells were plated onto 18-mm coverslips (Marienfeld, Lauda-Königshofen, Germany) coated with 0.05 mg/ml poly-D-lysine (Sigma-Aldrich). Cells were transfected with AP-rSlo-RFP and rβ4-GFP plasmids. At seventy-two hours after transfection, cells were fixed with 4% paraformaldehyde. Then the cells were imaged with confocal microscope (Olympus, Fluoview, FV1000).

For immunoprecipitation, COS-7 cells transiently expressing AP-rSlo-RFP together with GFP or rβ4-GFP were lysed with lysis buffer [1% NP-40, 40mM Tris-Cl pH7.5, 150mM NaCl, 10mM EDTA, 5mM EGTA, 5 % glycerol, 1mM PMSF, protease inhibitor cocktail (Calbiochem)] for 1 hr at 4°C. Cell lysates were centrifuged at 12,500 rpm for 10 min at 4°C for removing any insoluble matrix. Immunoprecipitation was performed using 2 μg anti-hSlo antibody (BD Biosciences) overnight. The immune complexes were captured using Protein G-Sepahrose (GE Healthcare) followed by washing with lysis buffer three times. The immunoprecipitated samples or 5 % of the input lysates were used for immunoblotting.

## Supplementary Figures and Movies

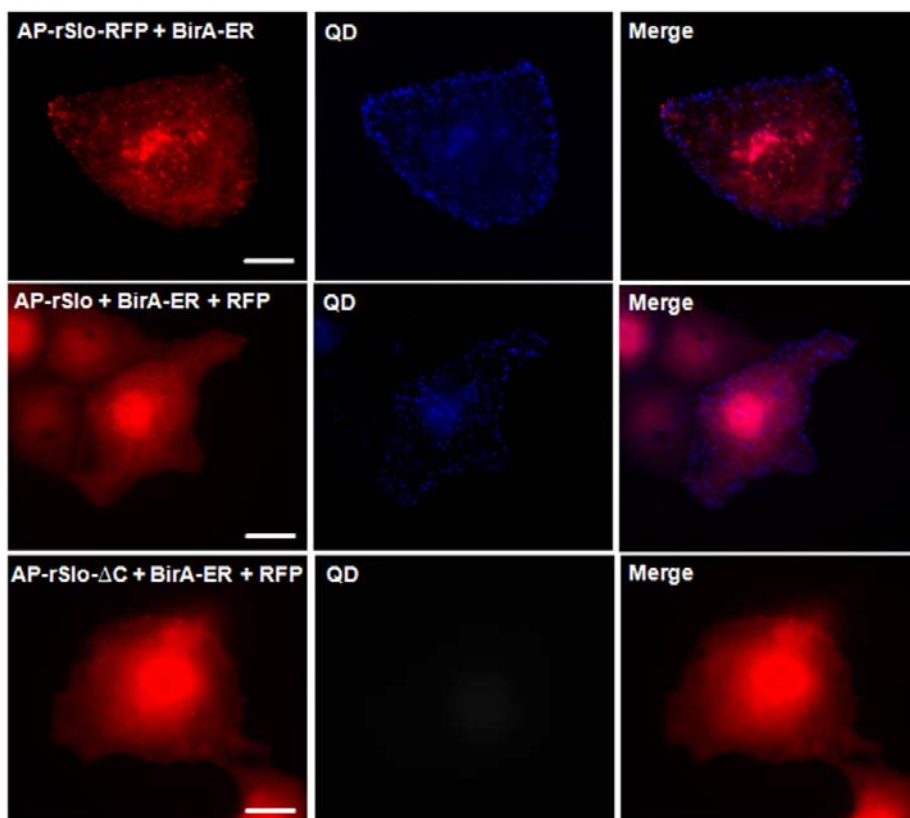

### **Figure S1**

Extracellular QD labeling of three different BK<sub>Ca</sub>  $\alpha$  subunit constructs. COS-7 cells were co-transfected with AP-rSlo-RFP and BirA-ER (1<sup>st</sup> row), AP-rSlo and BirA-ER (2<sup>nd</sup> row), or AP-rSlo- $\Delta$ C and BirA-ER (3<sup>rd</sup> row). In the cases of AP-rSlo (2<sup>nd</sup> row) and AP-rSlo- $\Delta$ C (3<sup>rd</sup> row), a plasmid harboring RFP was co-transfected in order to visualize the transfectants. Cells were then labeled with streptavidin-conjugated QD605. Cells expressing RFP or AP-rSlo-RFP are red (1<sup>st</sup> column) and QD605 is blue (2<sup>nd</sup> column). Merged images are also shown (3<sup>rd</sup> column). Scale bar, 10  $\mu$ m.

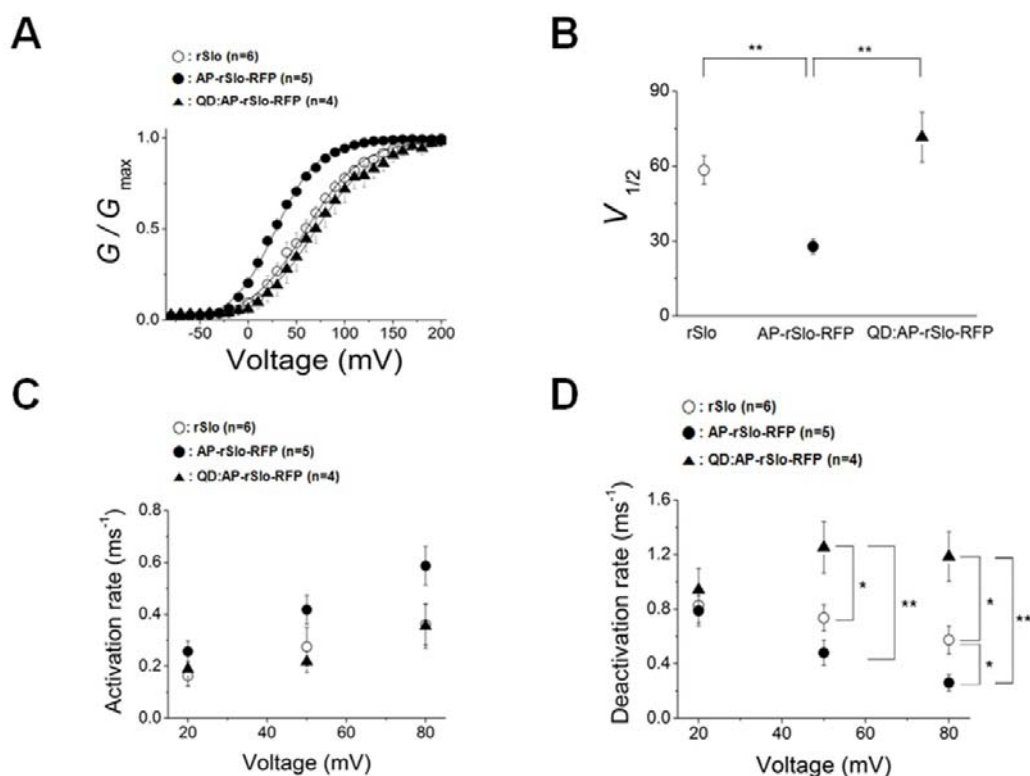

**Figure S2**

**A.** Conductance-voltage ( $G$ - $V$ ) relationship of the rSlo, AP-rSlo-RFP and QD labeled AP-rSlo-RFP (QD:AP-rSlo-RFP) at  $10 \mu\text{M} [\text{Ca}^{2+}]_i$ . The membrane was held at  $-100 \text{ mV}$  and then stepped from  $-80 \text{ mV}$  to  $200 \text{ mV}$  in  $10\text{-mV}$  increments. Conductance values were obtained from peak tail currents and normalized to the maximum conductance ( $G/G_{\max}$ ). Data points were fitted using the Boltzmann function. Throughout the figure, the symbols represent rSlo (*empty circle*), AP-rSlo-RFP (*filled circle*) and QD:AP-rSlo-RFP (*filled triangle*), respectively. **B.** Half-activation voltage ( $V_{1/2}$ ) values of rSlo, AP-rSlo-RFP and QD:AP-rSlo-RFP channels obtained at  $10 \mu\text{M} [\text{Ca}^{2+}]_i$ . **C** and **D.** Activation and deactivation kinetics of rSlo, AP-rSlo-RFP and QD:AP-rSlo-RFP channels. The activation and deactivation rate of the macroscopic current were plotted at  $20$ ,  $50$ , and  $80 \text{ mV}$  in the presence of  $10 \mu\text{M} [\text{Ca}^{2+}]_i$ . Time-constants of activation and deactivation were obtained by fitting the individual current traces to a single exponential function. Each data point represents the mean  $\pm$  S.E.M., and pairs of data points found to significantly differ from each other by paired Student's t-test at  $p < 0.05$  (\*) or  $p < 0.01$  (\*\*) are indicated.

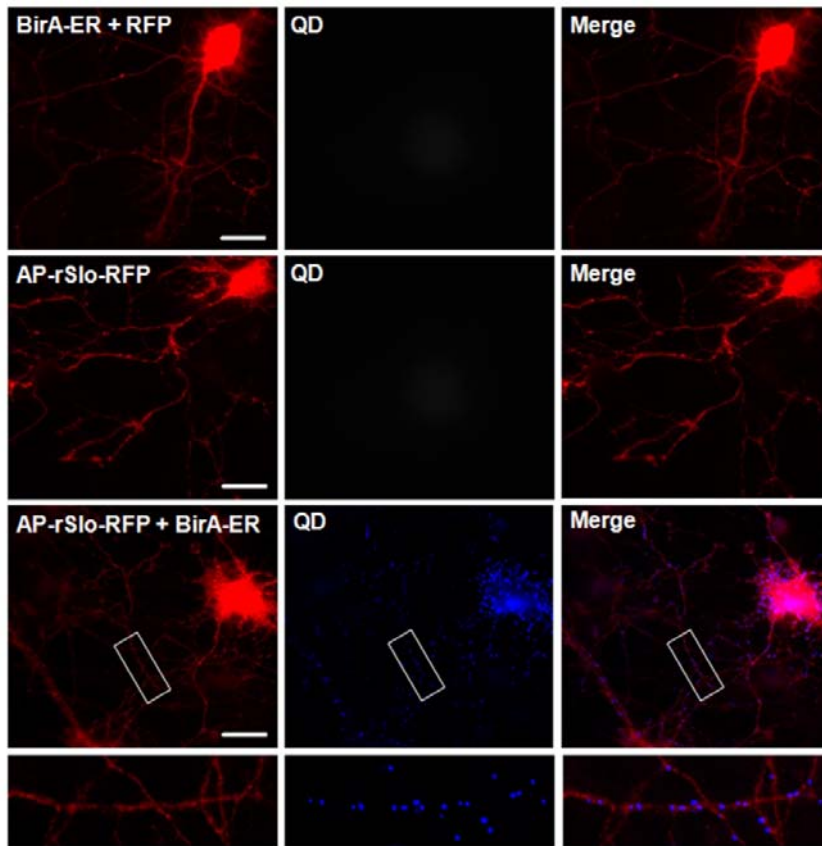

**Figure S3**

Specific labeling of AP-rSlo-RFP channels using QDs. Cultured rat hippocampal pyramidal neurons (DIV5) were transfected with BirA-ER and RFP (1<sup>st</sup> row), AP-rSlo-RFP (2<sup>nd</sup> row), or AP-rSlo-RFP and BirA-ER (3<sup>rd</sup> row). A magnified view (3×) of the highlighted regions in the 3<sup>rd</sup> row is shown in the 4<sup>th</sup> row. In the case of Bir-ER (1<sup>st</sup> row), a plasmid harboring RFP was co-transfected in order to visualize the transfectants. Cells were labeled with streptavidin-conjugated QD605 (Invitrogen). Cells expressing RFP or AP-rSlo-RFP are *red* (1<sup>st</sup> column) and QD605 is *blue* (2<sup>nd</sup> column). Merged images are also shown (3<sup>rd</sup> column). Scale bar, 10 μm.

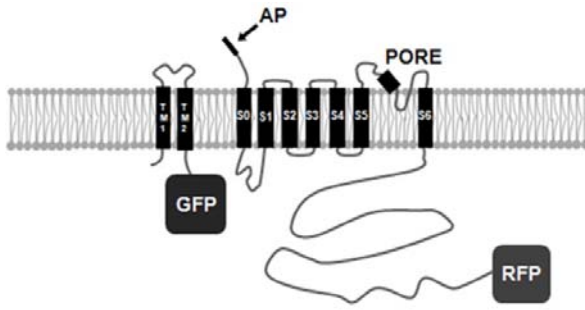

**Figure S4**

Schematic illustration of the  $\alpha$  and  $\beta_4$  subunits of BK<sub>Ca</sub> channel used in this experiment. Rat BK<sub>Ca</sub> channel  $\alpha$  subunit, rSlo, was tagged with an acceptor peptide (AP) at its N-terminus and a red fluorescent protein (RFP) at its C-terminus. Rat  $\beta_4$  subunit, r $\beta_4$ , was tagged with green fluorescent protein (GFP) at its C-terminus.

**A**

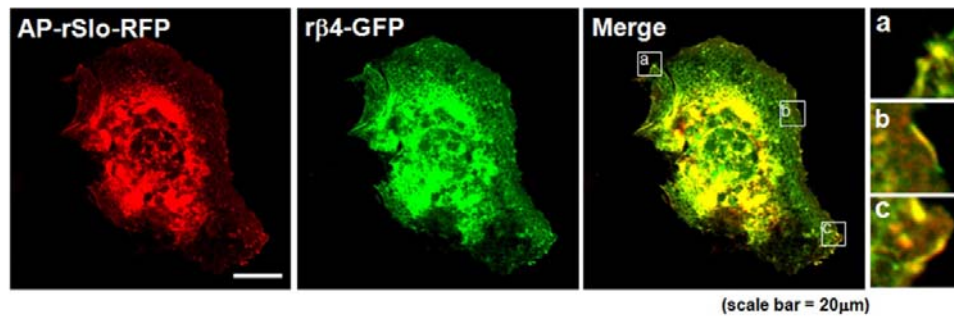

**B**

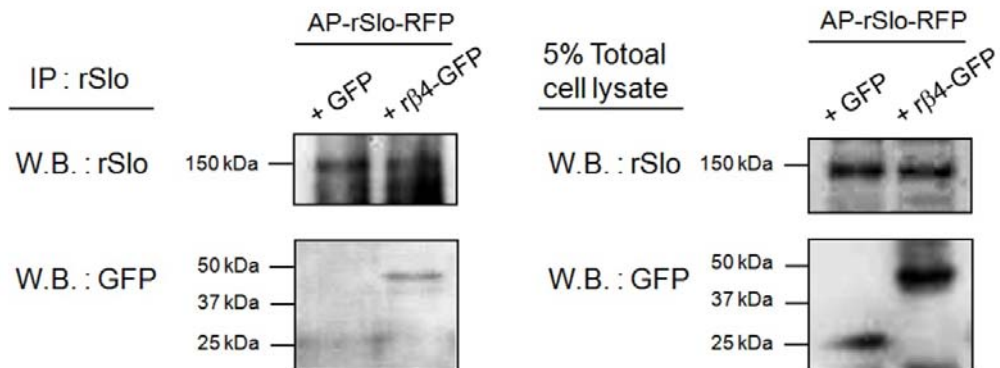

**Figure S5**

Interaction between AP-rSlo-RFP and r $\beta_4$ -GFP. **A**. Confocal images of COS-7 cells co-expressing AP-rSlo-RFP and r $\beta_4$ -GFP. Magnified views (4 $\times$ ) of the highlighted

regions were shown (**a-c**). **B**. Co-immunoprecipitation analysis of AP-rSlo-RFP and r $\beta$ 4-GFP. COS-7 cells transfected with AP-rSlo-RFP together with GFP or r $\beta$ 4-GFP were lysed. Cell lysates was subjected to immunoprecipitation using anti-hSlo antibody and the immune complexes were analyzed by western blot using anti-hSlo antibody or anti-GFP antibody.

**Movie S1**

QD-labeled rSlo channels in COS-7 cell.

**Movie S2**

QD-labeled rSlo channels in hippocampal neuron.

**Movie S3**

Zoom-in view: QD-labeled rSlo channels in soma of neuron.

**Movie S4**

Zoom-in view: QD-labeled rSlo channels in axodendrite of neuron.

**Movie S5**

QD-labeled rSlo/r $\beta$ 4 channels in COS-7 cell

**Movie S6**

Zoom-in view: QD-labeled rSlo/r $\beta$ 4 channels in soma of neuron

**Movie S7**

Zoom-in view: QD-labeled rSlo/r $\beta$ 4 channels in axodendrite of neuron.
